# Supplementary material
Source: publisher figshare collection journal article supplement (https://sage.figshare.com/ndownloader/files/16107062)
Supplement: Supplementary file 1 [file 16107062]

**Table S2 Details of the Slavin method**

|                              |                                                                                                             |
|------------------------------|-------------------------------------------------------------------------------------------------------------|
| <b>Strong evidence</b>       | multiple, relevant, high-quality randomized controlled trials (RCTs) with generally consistent outcomes.    |
| <b>Moderate evidence</b>     | one relevant, high-quality RCT and 1 or more relevant, low-quality RCTs with generally consistent outcomes. |
| <b>Limited evidence</b>      | one relevant, high-quality RCT or multiple relevant, low-quality RCTs with generally consistent outcomes.   |
| <b>Inconclusive evidence</b> | only 1 relevant, low-quality RCT, no relevant RCTs, or RCTs with inconsistent outcomes.                     |
